# Supplementary material for: Mass Spectrometry Insight for Assessing the Destiny of Plastics in Seawater
Source: MDPI journal article supplement (doi:10.3390/polym15061523), 2023-03-19
Supplement: s1 [file s1]

## Supplementary Materials

# Mass Spectrometry Insight for Assessing the Destiny of Plastics in Seawater

Olga V. Kuznetsova <sup>1</sup>, Sergey N. Shtykov <sup>2</sup> and Andrei R. Timerbaev <sup>2,3,\*</sup>

<sup>1</sup> Vernadsky Institute of Geochemistry and Analytical Chemistry, 119991 Moscow, Russia

<sup>2</sup> Institute of Chemistry, Saratov State University, 410012 Saratov, Russia

<sup>3</sup> Institute of Inorganic Chemistry, University of Vienna, 1090 Vienna, Austria

\* Correspondence: andrei.timerbaev@univie.ac.at

### Contents

Table S1. List of analyzed plastic samples

Table S2. Carbon and hydrogen isotope composition of IAEA-CH-7 at varying sample mass

Figure S1. Time-dependent variations of  $\delta^{13}\text{D}$

Table S3. Removal of metals from plastic material

**Table S1.** List of analyzed plastic samples.

| Code | Sample                      | Dimensions (mm) | Photo                                                                                | Plastic type <sup>a</sup> |
|------|-----------------------------|-----------------|--------------------------------------------------------------------------------------|---------------------------|
| B1   | Biodegradable knife         | 160 × 14 × 1    |  | Starch PP                 |
| B2   | Bio make-up sponge          | 55 × 37         |  | Starch                    |
| B3   | Biodegradable waste bags    | 125 × 60        |  | LD PE                     |
| B4   | Biodegradable seedling bags | 145 × 60        |  | S-PP                      |

|    |                          |          |                                                                                      |      |
|----|--------------------------|----------|--------------------------------------------------------------------------------------|------|
| N1 | Part of the food package | 56 × 31  |    | PP   |
| N2 | Part of the food package | 60 × 22  |    | PP   |
| N3 | Part of the food package | 70 × 91  |    | PP   |
| N4 | Pad                      | 55 × 55  |   | PVC  |
| N5 | Part of the food package | 64 × 78  |  | PE   |
| N6 | Part of the food package | 116 × 76 |  | PE   |
| N7 | A piece of Teflon mat    | 8 × 14   |  | PTFE |

|     |                                                    |                            |                                                                                      |           |
|-----|----------------------------------------------------|----------------------------|--------------------------------------------------------------------------------------|-----------|
| N8  | A piece of disposable cup                          | $62 \times 22$             |    | PP        |
| N9  | Medicine blister                                   | $96 \times 39$             |    | PP        |
| N10 | Part of the food package                           | $53 \times 60$             |    | PE        |
| N11 | Packaging material                                 | $112 \times 80 \times 0.3$ |   | PP        |
| P1  | Packaging from capsules for the elemental analyzer | $80 \times 30$             |  | PE        |
| P2  | Test tube                                          | $119 \times 16$            |  | PP        |
| P3  | Test Eppendorf tube                                | $17 \times 55$             |  | Virgin PP |

|    |                            |                |                                                                                       |           |
|----|----------------------------|----------------|---------------------------------------------------------------------------------------|-----------|
| P4 | Disposable fork            | 162 × 23       |     | PS        |
| P5 | Disposable spoon           | 164 × 37       |     | PS        |
| P6 | Disposable cup             | 95 × 65        |     | PP        |
| P7 | Packaging material         | 232 × 147      |    | LD PE     |
| B5 | Biodegradable ball airsoft | 5 × 5          |  | PLA       |
| P8 | Ball airsoft               | 5 × 5          |   | ABS       |
| B6 | Bio food container         | 190 × 145 × 70 |   | Starch PP |
| P9 | Teflon mat                 | 400 × 300      |   | PTFE      |

<sup>a</sup> PE = polyethylene; PP = polypropylene; LD PE = low density PE; S-PP = spunbond PP; PVC = polyvinylchloride; PTFE = polytetrafluoroethylene; virgin PP = PP free of bio-

cides, plasticizers and latex; PS = polystyrene; PLA = polylactide; ABS = acrylonitrile butadiene styrene; starch PP = modified corn starch agglomerated with PP, monoglyceride, ethylene vinyl acetate; starch = tapioca starch, corn starch, potato starch.

**Table S2.** Carbon and hydrogen isotope composition of IAEA-CH-7 at varying sample mass.

| Mass (mg) | $\delta^{13}\text{C}$ | $\delta\text{D}$ |
|-----------|-----------------------|------------------|
| 0.41      | -31.97                | -100.24          |
| 0.98      | -31.72                | -98.18           |
| 1.37      | -31.81                | -98.23           |
| 1.86      | -31.77                | -99.31           |
| 2.34      | -31.55                | -100.16          |
| 2.66      | -31.46                | -98.84           |
| 3.05      | -31.93                | -100.34          |
| 3.49      | -31.74                | -98.89           |
| 4.12      | -31.99                | -97.88           |
| 4.68      | -31.43                | -99.16           |
| 5.15      | -32.00                | -100.12          |

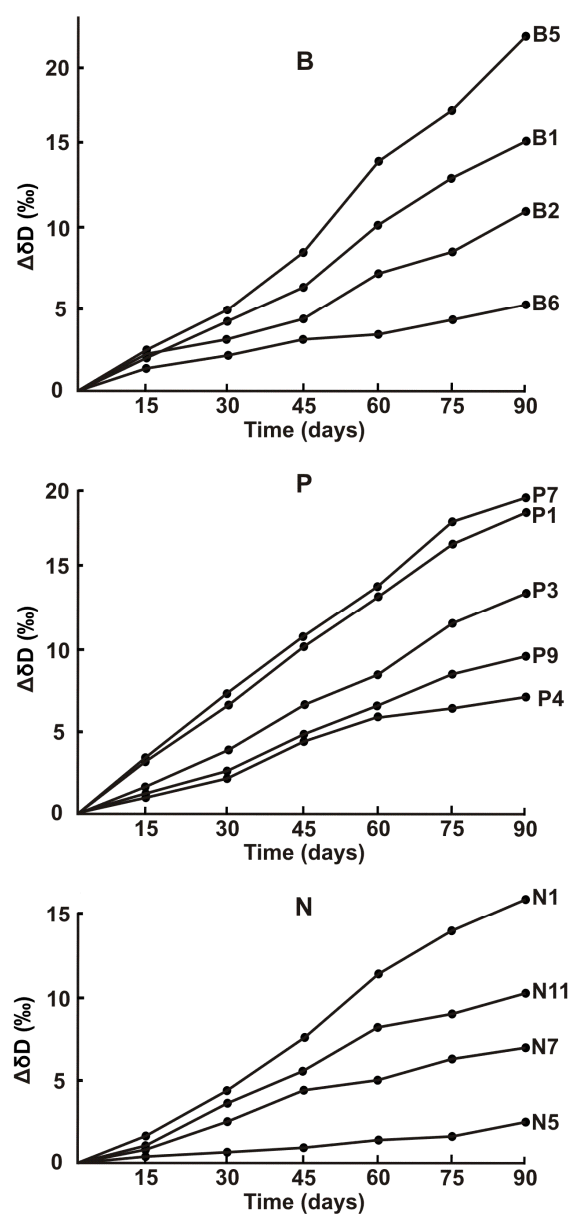

**Figure S1.** Time-dependent variations of  $\delta^{13}\text{D}$ . Indices B, P and N correspond to the respective polymer classes.

**Table S3.** Removal of metals from plastic material.

| Metal     | Sample | Concentration in Plastic Leachates ( $\mu\text{g}\cdot\text{g}^{-1}$ ) |                   |                   |                   |
|-----------|--------|------------------------------------------------------------------------|-------------------|-------------------|-------------------|
|           |        | 5%                                                                     | 10%               | 20%               | 30%               |
| <b>Cd</b> | N6     | $0.007 \pm 0.001$                                                      | $0.009 \pm 0.001$ | $0.021 \pm 0.005$ | $0.020 \pm 0.001$ |
|           | N7     | $0.03 \pm 0.003$                                                       | $0.04 \pm 0.003$  | $0.010 \pm 0.002$ | $0.11 \pm 0.005$  |
| Co        | N6     | $0.20 \pm 0.02$                                                        | $0.50 \pm 0.01$   | $0.60 \pm 0.02$   | $1.2 \pm 0.07$    |
|           | N7     | $0.50 \pm 0.05$                                                        | $0.70 \pm 0.04$   | $0.90 \pm 0.04$   | $1.2 \pm 0.1$     |
| Cu        | N6     | $3.9 \pm 0.3$                                                          | $4.0 \pm 0.2$     | $4.9 \pm 0.3$     | $5.6 \pm 0.4$     |
|           | N7     | $4.1 \pm 0.3$                                                          | $5.5 \pm 0.3$     | $6.6 \pm 0.5$     | $7.8 \pm 0.4$     |
| Cr        | N6     | $4.3 \pm 0.3$                                                          | $4.4 \pm 0.4$     | $4.8 \pm 0.3$     | $5.0 \pm 0.4$     |
|           | N7     | $4.3 \pm 0.4$                                                          | $4.5 \pm 0.5$     | $4.7 \pm 0.2$     | $5.2 \pm 0.3$     |
| Fe        | N6     | $85 \pm 7$                                                             | $87 \pm 7$        | $92 \pm 8$        | $95 \pm 7$        |
|           | N7     | $84 \pm 8$                                                             | $89 \pm 6$        | $95 \pm 6$        | $99 \pm 8$        |
| Mn        | N6     | $5.4 \pm 0.6$                                                          | $5.3 \pm 0.4$     | $5.8 \pm 0.5$     | $6.3 \pm 0.6$     |
|           | N7     | $46 \pm 4$                                                             | $51 \pm 5$        | $55 \pm 9$        | $57 \pm 6$        |
| Mo        | N6     | $0.11 \pm 0.01$                                                        | $0.15 \pm 0.01$   | $0.18 \pm 0.01$   | $0.22 \pm 0.02$   |
|           | N7     | $1.2 \pm 0.1$                                                          | $1.5 \pm 0.1$     | $1.6 \pm 0.2$     | $1.7 \pm 0.1$     |
| Ni        | N6     | $5.4 \pm 0.4$                                                          | $5.8 \pm 0.3$     | $6.0 \pm 0.5$     | $6.0 \pm 0.5$     |
|           | N7     | $4.0 \pm 0.2$                                                          | $4.6 \pm 0.4$     | $4.9 \pm 0.4$     | $5.1 \pm 0.5$     |
| Pb        | N6     | $0.43 \pm 0.03$                                                        | $0.46 \pm 0.04$   | $0.5 \pm 0.05$    | $0.51 \pm 0.04$   |
|           | N7     | $5.1 \pm 0.4$                                                          | $5.4 \pm 0.6$     | $5.6 \pm 0.4$     | $5.8 \pm 0.5$     |
| Ti        | N6     | $0.49 \pm 0.03$                                                        | $0.54 \pm 0.02$   | $0.57 \pm 0.03$   | $0.62 \pm 0.05$   |
|           | N7     | $2.5 \pm 0.2$                                                          | $3.0 \pm 0.3$     | $3.1 \pm 0.3$     | $3.3 \pm 0.2$     |
| V         | N6     | $0.16 \pm 0.01$                                                        | $0.18 \pm 0.01$   | $0.2 \pm 0.01$    | $0.22 \pm 0.02$   |
|           | N7     | $0.45 \pm 0.05$                                                        | $0.47 \pm 0.03$   | $0.5 \pm 0.04$    | $0.53 \pm 0.04$   |
| Zn        | N6     | $14.3 \pm 1.2$                                                         | $14.5 \pm 1.2$    | $14.8 \pm 1.3$    | $15.0 \pm 1.0$    |
|           | N7     | $15.1 \pm 1.0$                                                         | $15.5 \pm 1.2$    | $15.8 \pm 1.1$    | $16.1 \pm 1.3$    |
